# Supplementary material
Source: publisher site journal article supplement (https://www.dovepress.com/article/463765)
Supplement: Supplementary file 1 [file get_supplementary_file.php]

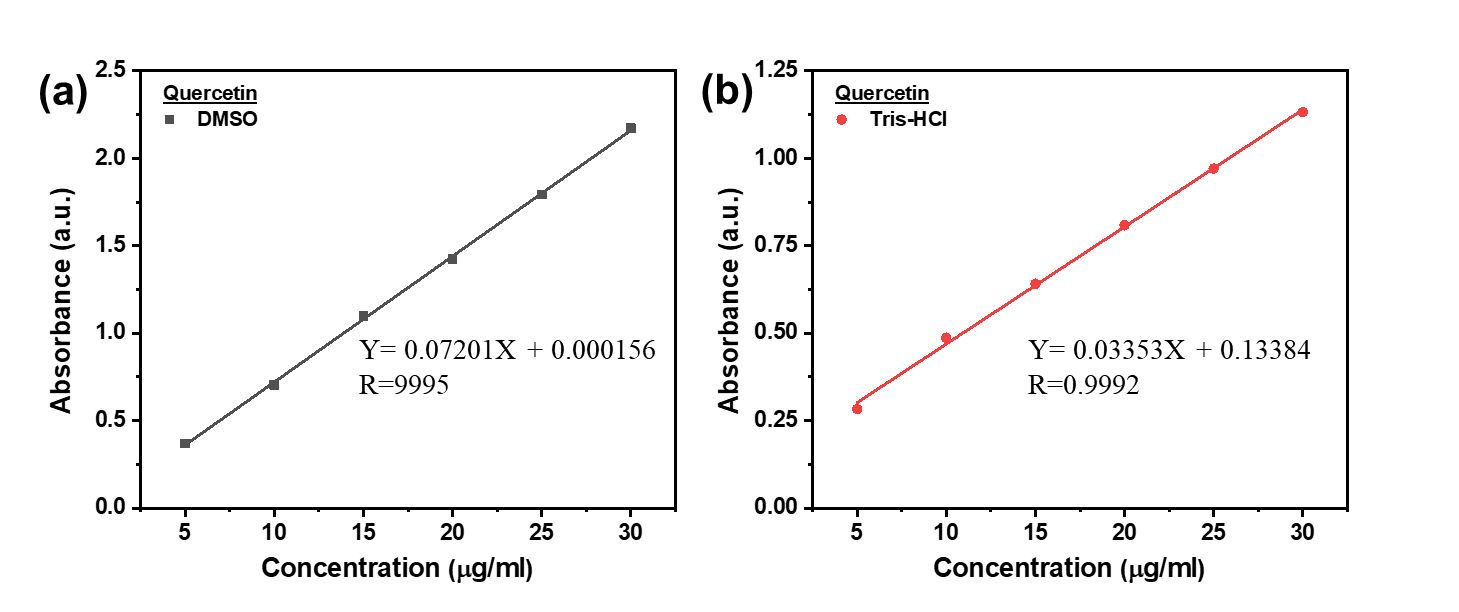


**Figure S1.** Standard curve of (a) QUER in DMSO and (b) QUER in Tris-HCl.


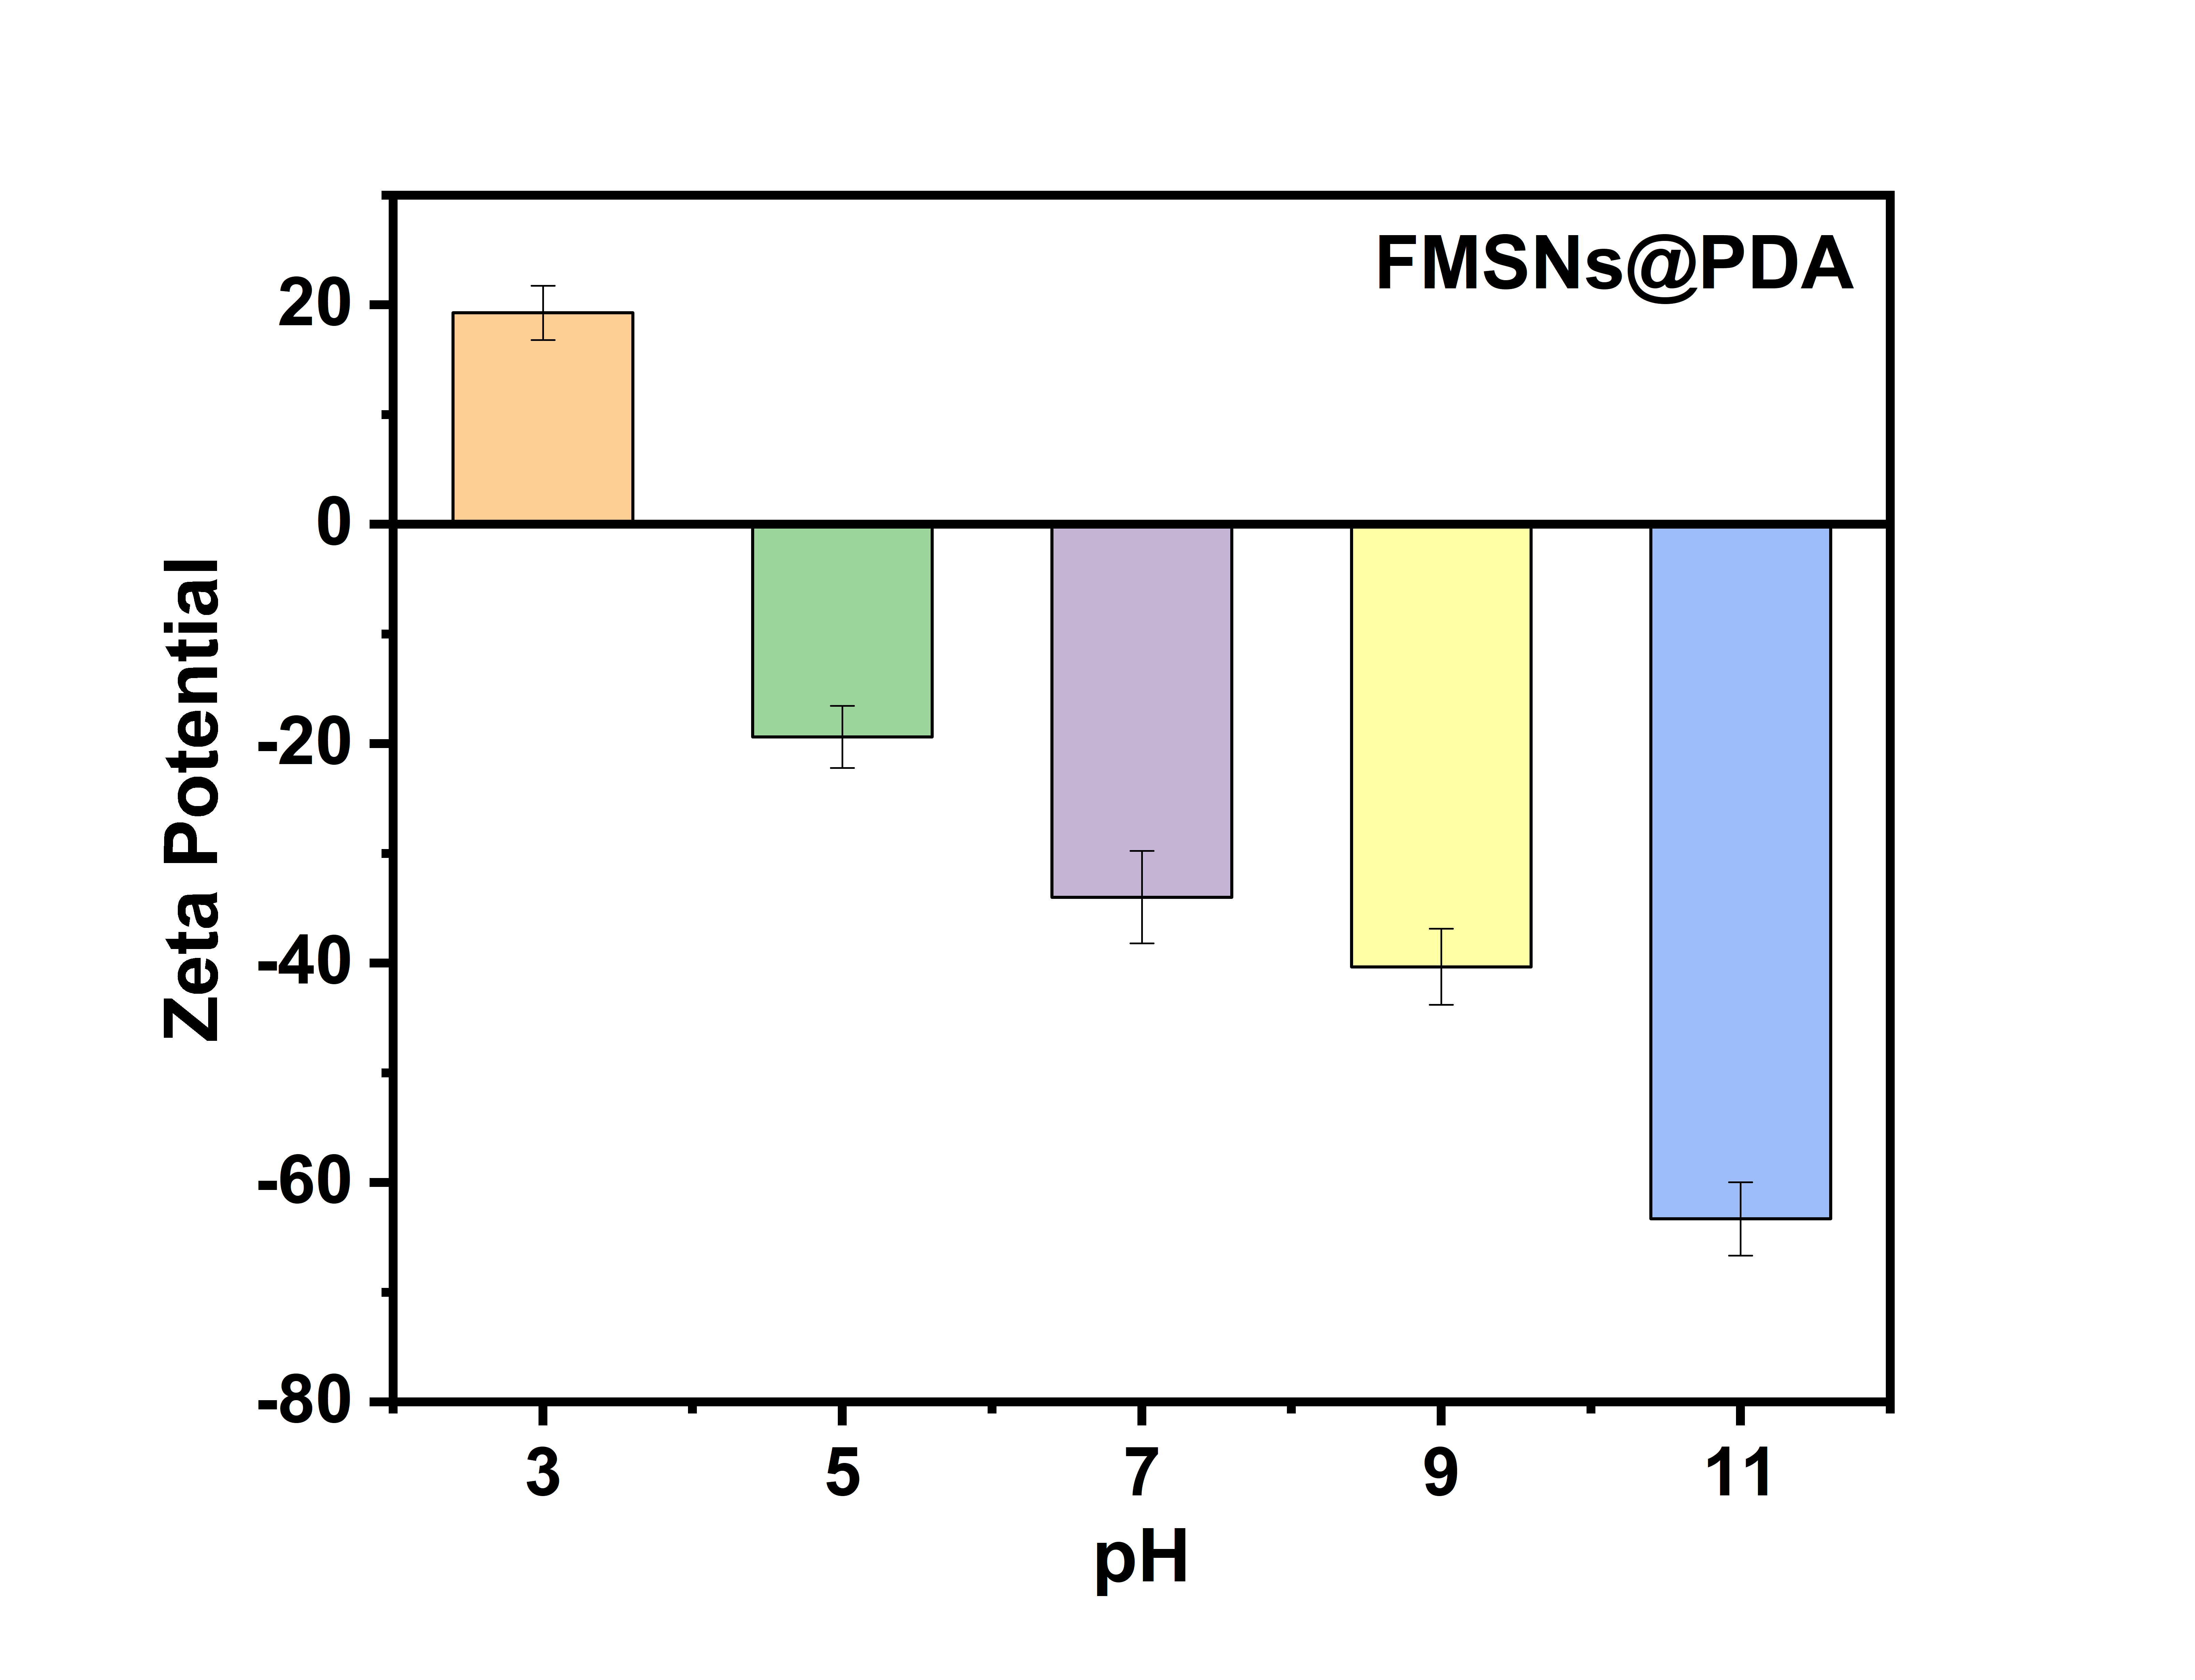


**Figure S2.** Zeta potentials of FMSNs@PDA in HPLC water at different pH values adjusted by HCl and NaOH agents. Zeta potential and particle size of the samples were measured by Electrophoretic Light Scattering method (ELSZ-2000, Otsuka).

**
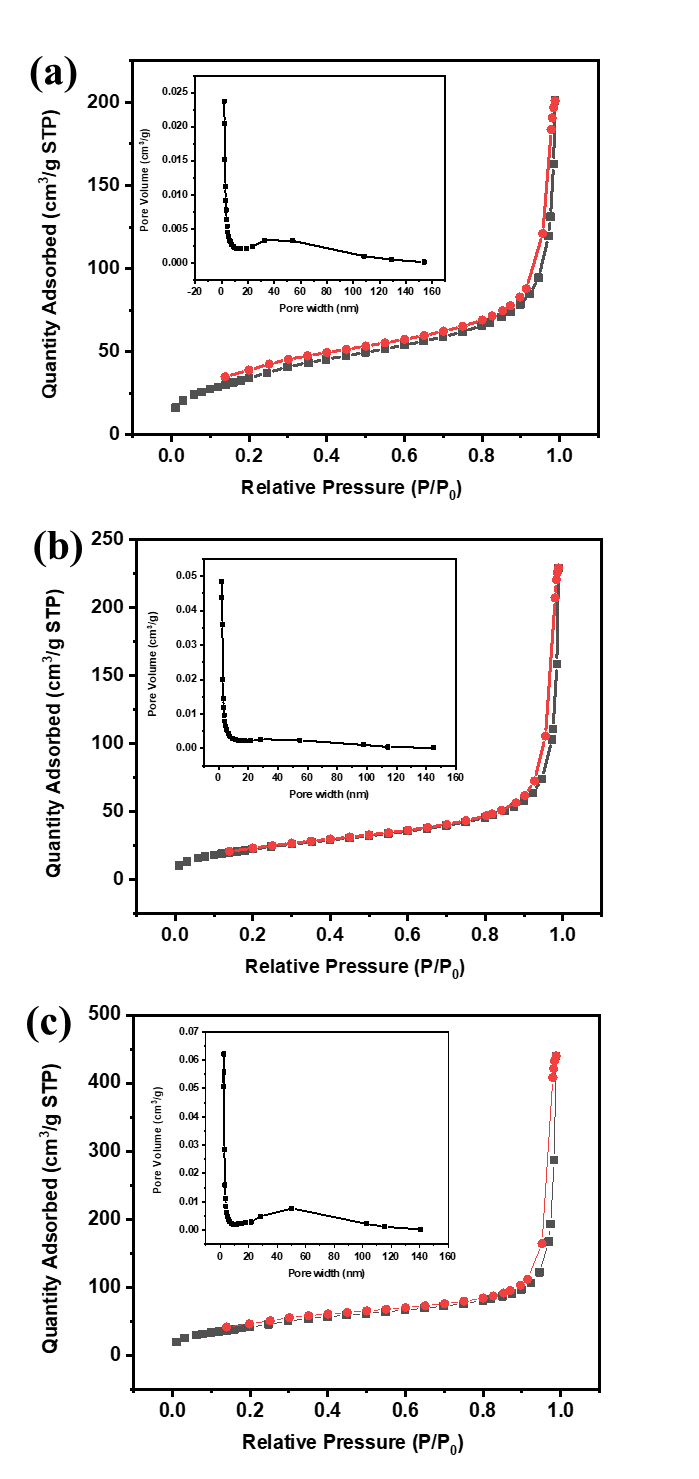
**

**Figure S3.** Nitrogen adsorption/desorption isotherms and pore size distribution by BJH analysis of (a) MSNs and (b) FMSNs (c) FMSNs@PDA.

**Table S1.** Zeta potential and Particles size of samples (MSNs, FMSNs and FMSNs@PDA) in PBS pH 7.4 by ELS

| Samples | Zeta potential (mV) | Particle size (nm) |
| --- | --- | --- |
| MSNs | -31.53 ± 1.96 | 149.6 ± 30.2 |
| FMSNs | -21.12 ± 2.31 | 154.6 ± 22.5 |
| FMSNs@PDA | -45.16 ± 1.45 | 164.0 ± 38.9 |

**Table S2.** Physicochemical properties of the samples measured by BET–BJT methods

| Samples | Surface area (m2/g) | Pore size (nm) |
| --- | --- | --- |
| MSNs | 84.51 | 9.76 |
| FMSNs | 127.36 | 17.11 |
| FMSNs@PDA | 156.55 | 16.70 |
